# Supplementary material
Source: PubMed Central journal article supplement (PMC3697554)
Supplement: AEM.00569-13_zam999104484so1.pdf [file AEM.00569-13_zam999104484so1.pdf]

## Supplementary Information

### Contents:

|                                                          |        |
|----------------------------------------------------------|--------|
| Sequences of OTUs present at >1% relative abundance..... | p. 1-2 |
| Fig. S1.....                                             | p. 3   |
| Fig. S2.....                                             | p. 4   |
| Fig. S3.....                                             | p. 5   |

---

### Sequences of OTUs present at >1% relative abundance

The following 16S rRNA amplicon sequences correspond to the OTUs shown in Figs. 5&6. They have been processed as described in the materials and methods. The header line for each sequence contains the greengenes taxonomy followed by white space and then a short name used in the manuscript. The raw sequence data can be downloaded from the Short Read Archive SRP021172.

```
>k__Bacteria;p__Firmicutes;c__Clostridia;o__Clostridiales;f__Veillonellaceae;g__Pectinat
us;s__ Pectinatus 1
AAGGCCCGGGAACGTATTCACCGCAGTATGCTGACCTGCGATTACTAGCGATTCCGACTTCATGCAGGCGGGTTGCAGCCTGCAATCC
GAAGTGGGAGACATTTTTTGGGGTCCGCTCCAGATCACTCCTTCGCTTCCCTCTGTGTGCCATTGTAGTACGTGTGTAGCCCAGGA
CGTAAGGGGCATGATGACTTGACGTCATCCCCGCCTTCCCTCCGCGTGTGCCGCGCAGTCTCACTTGAGTTCCCACCTTTACGTGCTG
GCAACAAATGATAGGGGTTGCGCTCGTTGCGGGACTTAACCCAACATCTCACGACACGAGCTGACGACAGCCATGCACCACCTGTT
>k__Bacteria;p__Bacteroidetes;c__Bacteroidia;o__Bacteroidales;f__g__s__
Bacteroidales 2
AAGGCCCGGGAACGTATTCACCGCAGTATGCTGACCGGATTACTAGCGAATCCAGCTTCATGGAGTTCGGGTTGCAGACTCCAATC
CGAAGTGGAGTGGTTTTTGGGATTAGCATCACGTCGCGGTGTAGCTGCCTTCTGTACCACCCATTGTAACACGTGTGTAGCCCCGGA
CGTAAGGGCCGTGCTGATTTGACGTCATCCCCACCTTCCCTCACATCTTACGACGGCAGTCTCTCCAGAGTCCCGGCATCACCCGATG
GTAAGTGGAAATAAGGGTTGCGCTCGTTATGGCACTTAAGCCGACACCTCACGGCAGAGCTGACGACAACCATGCAGCACCTTCA
>k__Bacteria;p__Firmicutes;c__Clostridia;o__Clostridiales;f__g__s__ Clostridiales 1
AAGACCCGGGAACGTATTCACCGCAGCATTCTGATCTGCGATTACTAGCAACTCCGACTTCACGCAGGCGGGTTTCAGCCTGCGATCC
GAAGTGGGACCGTTTTTGGTATTGCTCCGCTCGCGGCTTCGCGTCCCGCTGTACCGGCCATTGTAGCACGTGTGTAGCCCAGAAC
ATAAGGGGCATGACGATTTGACGTCATCCCCACCTTCCCTCCGAGTTATCCCCGGCAGTCCCTTTAGAGTGCCCGCCATAACGCGATGG
CAACTAAAGGCAAGGGTTGCGCTCGTTGCGGGACTTAACCCAACATCTCACGACACGAGCTGACGACAACCATGCACCACCTGTCT
>k__Bacteria;p__Firmicutes;c__Clostridia;o__Clostridiales;f__Veillonellaceae;g__Dialiste
r;s__ Dialister 1
AAGGCCCGGGAACGTATTCACCGCGTATGCTGACCGCGATTACTAGCGATTCTGCTTCATGCAGGCGGGTTGCAGCCTGCAATCT
GAAGTGGGGTGTGTTTTTGGGTTTGTCTCCGGGTCGCCCCATTGCTTCTCTTTGTTGACACCCATTGTAGTACGTGTGTAGCCCAGG
TCATAAGGGGCATGATGACTTGACGTCATCCCCGCCTTCCCTCCGCGTGTGCCGCGCGGTCTCTCATGAGTTCACCACATTACGTGCT
GGCAACATAAGATAGGGGTTGCGCTCGTTGCGGGACTTAACCCAACATCTCACGACACGAGCTGACGACAGCCGTGCACCACCTGT
>k__Bacteria;p__Proteobacteria;c__Gammaproteobacteria;o__Oceanospirillales;f__Pseudomona
daceae;g__Pseudomonas;s__ Pseudomonas 1
AAGGCCCGGGAACGTATTCACCGCAGCATTCTGATTTCGCGATTACTAGCGATTCCGACTTCACGCAGTTCGAGTTGCAGACTGCGATCC
GGACTACGATCGGTTTTTGGGATTAGCTCCACCTCGCGGCTTGGCAACCCTCTGTACCGACCATTGTAGCACGTGTGTAGCCCAGGC
CGTAAGGGCCATGATGACTTGACGTCATCCCCACCTTCCCTCCGTTTGTCCACGGCAGTCTCCTTAGAGTGCCCAACATTACGTGCTG
GTAAGTAAAGGACAAGGGTTGCGCTCGTTACGGGACTTAACCCAACATCTCACGACACGAGCTGACGACAGCCATGCAGCACCTGTCT
>k__Bacteria;p__Firmicutes;c__Clostridia;o__Clostridiales;f__Clostridiaceae;g__Clostridi
um;s__ Clostridium butyricum Clostridium 3
AAGGCCCGGGAACGTATTCACCGCAGCATTCTGATTTCGCGATTACTAGCAACTCCGACTTCATGTAGGCGAGTTTCAGCCTACAATCC
GAAGTGGAGTTCGGTTTTTATAGTTTTGCTCACTCTCGCGAGGTTGCATCTCATTGTACCGACCATTGTAGCACGTGTGTAGCCCTAGAC
ATAAGGGGCATGATGATTTGACGTCATCCCCACCTTCCCTCCGTTTAAACCGGGCAGTCTCGCTAGAGTGTCTCAACTAAATGGTATGCA
ACTAACAATAAGGGTTGCGCTCGTTGCGGGACTTAACCCAACATCTCACGACACGAGCTGACGACAACCATGCACCACCTGTCTTC
```

>k\_\_Bacteria;p\_\_Proteobacteria;c\_\_Betaproteobacteria;o\_\_Burkholderiales;f\_\_Alcaligenaceae;g\_\_s\_\_Alcaligenaceae 1  
AAGACCCGGGAACGTATTACCGCGGCATGCTGATCCGCGATTACTAGCGATTCCGACTTCATGCAGTTCGAGTTGCAGACTGCAATCC  
GGACTACGATCGGTTTTCTGGGATTAGCTCCGCTCCCGGCTTCGCTGCCCTCTGTTCCGACCATTGTATGACGTGTGAGGCCCTAGC  
CGTAAGGGCCATGAGGACTTGACGTCATCCCCATCTTCTCCGGTTTGTACCGGGGCTCCTCATCAGAGTGTCTTGCCTAGCAACTG  
ATGACAAGGGTTGCGCTCGTTGCGGGACTTAACCCAACATCTCACGACACGAGCTGACGACAGCCATGCAGCACCTGTGTTCAGGC  
>k\_\_Bacteria;p\_\_Firmicutes;c\_\_Clostridia;o\_\_Clostridiales;f\_\_Veillonellaceae;g\_\_s\_\_  
Veillonellaceae sp. 2  
AAGGCCCGGGAACGTATTACCGCAGTATGCTGACCTGCGATTACTAGCGATTCCGACTTCATGCAGGCGAGTTGCAGCCTGCAATCC  
GAAGTGGAGACGCTTTTCTGGGGTTTCGCTCCACCTCGCGGCTTCGCTTCCCTCTGTGCGCCCCATTGTAGTACGTGTGTAGCCCAAGA  
CATAAGGGGCATGATGACTTGACGTCATCCCCGCTTCTCCGCGTTCCTCCGCGCAGTCTCCTTTGAGTTCCCACCATTGCGTGTCTG  
GCAACAAAGAAATAGGGGTTGCGCTCGTTGCGGGACTTAACCCAACATCTCACGACACGAGCTGACGACAGCCATGCACCACCTGTT  
>k\_\_Bacteria;p\_\_Firmicutes;c\_\_Clostridia;o\_\_Clostridiales;f\_\_Ruminococcaceae;g\_\_s\_\_  
Ruminococcaceae 1  
AAGGCCCGGGAACGTATTACCGCGGCATTCTGATCCGCGATTACTAGCAATCCATCTTCATGTAGGCGAGTTTCAGCCTACAATCC  
GAAGTGGAGACGCTTTTTAGAGTTTTGCTCCACCTCGCGGCTTCGCTTCCCTCTGTGCGCCCCATTGTAGTACGTGTGTAGCCCAAGT  
CATAAGGGGCATGATGATTGACGTCATCCCCACCTTCTCCGCGTTCCTCCGCGCAGTCTCCTTTGAGTTCCCACCATTGCGTGTCTG  
GCAACAAAGAAATAGGGGTTGCGCTCGTTGCGGGACTTAACCCAACATCTCACGACACGAGCTGACGACAGCCATGCACCACCTGTT  
>k\_\_Bacteria;p\_\_Firmicutes;c\_\_Clostridia;o\_\_Clostridiales;f\_\_Lachnospiraceae;g\_\_Clostrid  
ium;s\_\_Clostridium 4  
AAGACCCGGGAACGTATTACCGCGGCATTCTGATCCGCGATTACTAGCGATTCCGACTTCATGTAGTTCGAGTTGCAGACTACAATCC  
GAAGTGGAGACGCTTTTTAGAGTTTTGCTCCAGATCGCTCCTTTGCTTCCCTTTGTTTACGCCATTGTAGCACGTGTGTAGCCCAAT  
CATAAGGGGCATGATGATTGACGTCATCCCCACCTTCTCCGCGTTCCTCCGCGCAGTCTCCTTAGAGTGTCTTGCCTAGCAACTA  
ACAGTAAGGGTTGCGCTCGTTGCGGGACTTAACCCAACATCTCACGACACGAGCTGACGACAACCATGCACCACCTGTCTTACCCT  
>k\_\_Bacteria;p\_\_Firmicutes;c\_\_Clostridia;o\_\_Clostridiales;f\_\_Lachnospiraceae;g\_\_Clostrid  
ium;s\_\_Clostridium 4  
AAGACCCGGGAACGTATTACCGCGGCATTCTGATCCGCGATTACTAGCGATTCCGACTTCATGTAGTTCGAGTTGCAGACTACAATCC  
GAAGTGGAGACGCTTTTTAGAGTTTTGCTCCAGATCGCTCCTTTGCTTCCCTTTGTTTACGCCATTGTAGCACGTGTGTAGCCCAAT  
CATAAGGGGCATGATGATTGACGTCATCCCCACCTTCTCCGCGTTCCTCCGCGCAGTCTCCTTAGAGTGTCTTGCCTAGCAACTA  
GCTACTAAGGATAAGGGTTGCGCTCGTTGCGGGACTTAACCCAACATCTCACGACACGAGCTGACGACAACCATGCACCACCTGTC  
>k\_\_Bacteria;p\_\_Firmicutes;c\_\_Clostridia;o\_\_Clostridiales;f\_\_Veillonellaceae;g\_\_Selenom  
onas;s\_\_Selenomonas 1  
AAGGCCCGGGAACGTATTACCGCAGTATGCTGACCTGCGATTACTAGCGATTCCGACTTCATGCAGGCGGGTTTCAGCCTGCAATCC  
GAAGTGGAGATGATTTATAGGTTTTGCTCCAGATCGCTCCTTTGCTTCCCTTTGTTTACGCCATTGTAGCACGTGTGTAGCCCAAGT  
CATAAGGGGCATGATGACTTGACGTCATCCCCACCTTCTCCGCGTTCCTCCGCGCAGTCTCCTTAGAGTGTCTTGCCTAGCAACTA  
GCAACAGAAAATAGGGGTTGCGCTCGTTGCGGGACTTAACCCAACATCTCACGACACGAGCTGACGACAGCCATGCACCACCTGTT  
>k\_\_Bacteria;p\_\_Bacteroidetes;c\_\_Bacteroidia;o\_\_Bacteroidales;f\_\_s\_\_  
Bacteroidales 1  
AAGGCCCGGGAACGTATTACCGCGGCATGCTGATGCGCGATTACTAGCGAATCCAGCTTCGTTGGAGTTCGGGTTGCAGACTCCAGTC  
CGAACTGAGAGAGGCTTTTGGGATTAGCTACCGTTACACGCGCCGCTGCCTGTGTACCCCCATTGTAACACGTGTGTAGCCCGGA  
CGTAAGGGCCGTGTGATTTGACGTCATCCCCACCTTCTTCAATCTTACGACGGCAGTCTCTCCAGAGTCCCGCCACTACGCGCTG  
GTAAGTGAAGATAAGGGTTGCGCTCGTTATGGCACTTAAGCCGACACCTCACGGCACGAGCTGACGACAACCATGCAGCACCTTCA  
>k\_\_Bacteria;p\_\_Firmicutes;c\_\_Bacilli;o\_\_Lactobacillales;f\_\_Enterococcaceae;g\_\_Enterococ  
cus;s\_\_Enterococcus 1  
AAGGCCCGGGAACGTATTACCGCGGTGCTGATCCGCGATTACTAGCGATTCCGACTTCATGTAGGCGAGTTGCAGCCTACAATCC  
GAAGTGGAGAGAGCTTTAAGAGATTAGCTTAGCCTCGCGACTTCGCGACTCGTTGTACTTCCCATTGTAGCACGTGTGTAGCCCAAGT  
CATAAGGGGCATGATGATTGACGTCATCCCCACCTTCTCCGCGTTCCTCCGCGCAGTCTCCTTAGAGTGTCTTGCCTAGCAACTA  
AATAAAGATAAGGGTTGCGCTCGTTGCGGGACTTAACCCAACATCTCACGACACGAGCTGACGACAACCATGCACCACCTGTAC  
>k\_\_Bacteria;p\_\_Firmicutes;c\_\_Clostridia;o\_\_Clostridiales;f\_\_Veillonellaceae;g\_\_s\_\_  
Veillonellaceae 1  
AAGGCCCGGGAACGTATTACCGCAGTATGCTGACCTGCGATTACTAGCGATTCCGACTTCATGCAGGCGGGTTTCAGCCTACAATCC  
GAAGTGGGACTCTGTTTTGGGGTTTCTCCAGATCGCTCCTTCGCGTCCCTCTATTAAGAGCCATTGTAGTACGTGTGTAGCCCAAG  
CCATAAGGGGCATGATGACTTGACGTCATCCCCGCTTCTCCGCGATTGTCTGCGGCAGTCTCCTTAGAGTCCCACCCTTACGTGCT  
GGTAACAGAAGATAGGGGTTGCGCTCGTTGCGGGACTTAACCCAACATCTCACGACACGAGCTGACGACAACCATGCAGCACCTGT  
>k\_\_Bacteria;p\_\_Proteobacteria;c\_\_Gammaproteobacteria;o\_\_Enterobacteriales;f\_\_Enterobact  
eriaceae;g\_\_Citrobacter;s\_\_Citrobacter 1  
AAGGCCCGGGAACGTATTACCGTGGCATTCTGATCCACGATTACTAGCGATTCCGACTTCATGGAGTTCGAGTTGCAGACTCCAATCC  
GGACTACGACATACTTTATGAGGTCGCTTGTCTCGCGAGGTCGCTTCTCTTTGTATATGCCATTGTAGCACGTGTGTAGCCCTACT  
CGTAAGGGCCATGATGACTTGACGTCATCCCCACCTTCTCCAGTTTATCACTGGCAGTCTCCTTTGAGTTCCCAGGCGGACCGCTGG  
CAACAAAGGATAAGGGTTGCGCTCGTTGCGGGACTTAACCCAACATCTCACAAACAGAGCTGACGACAGCCATGCAGCACCTGTCT  
>k\_\_Bacteria;p\_\_Firmicutes;c\_\_Clostridia;o\_\_Clostridiales;f\_\_Clostridiaceae;g\_\_Clostridi  
um;s\_\_Clostridium 1  
AAGGCCCGGGAACGTATTACCGCGCATGCTGATTCCGCGATTACTAGCAACTCCAGCTTCATGTAGGCGAGTTTCAGCCTACAATCC  
GAAGTGGAGATGAGTTTTAAAGTTTTGCTCCACCTCACGGTTCGCTTCTTGTACTCACCATTGTAGCACGTGTGTAGCCCTAGA  
CATAAGGGGCATGATGATTGACGTCATCCCCACCTTCTCCGCGTTCCTCCGCGTTCCTCCGCGCAGTCTCCTTAGAGTGTCTAACTAATGGTAGC  
AACTAATGATAAGGGTTGCGCTCGTTGCGGGACTTAACCTAACATCTCACGACACGAGCTGACGACAACCATGCACCACCTGTCTC  
>k\_\_Bacteria;p\_\_Firmicutes;c\_\_Clostridia;o\_\_Clostridiales;f\_\_Clostridiaceae;g\_\_Clostridi  
um;s\_\_Clostridium 2  
AAGGCCCGGGAACGTATTACCGCAACATCTGATTTGCGATTACTAGCAACTCCAGCTTCATGTAGGCGAGTTTCAGCCTACAATCC  
GAAGTGGGATGGTTTTTGGTTTTAGCTCCACCTTGCCTGCTTGCATCTTTTTGTTCCACCATTGTAGCACGTGTGTAGCCCAAGAC  
ATAAGGGGCATGATGATTGACGTCATCCCCACCTTCTCCGCGTTCCTCCGCGGAGTCTCACTAGAGTGTCTCAACTAAATGTTAGCA  
ACTAATGATAAGGGTTGCGCTCGTTGCGGGACTTAACCCAACATCTCACGACACGAGCTGACGACAACCATGCACCACCTGTCTTC

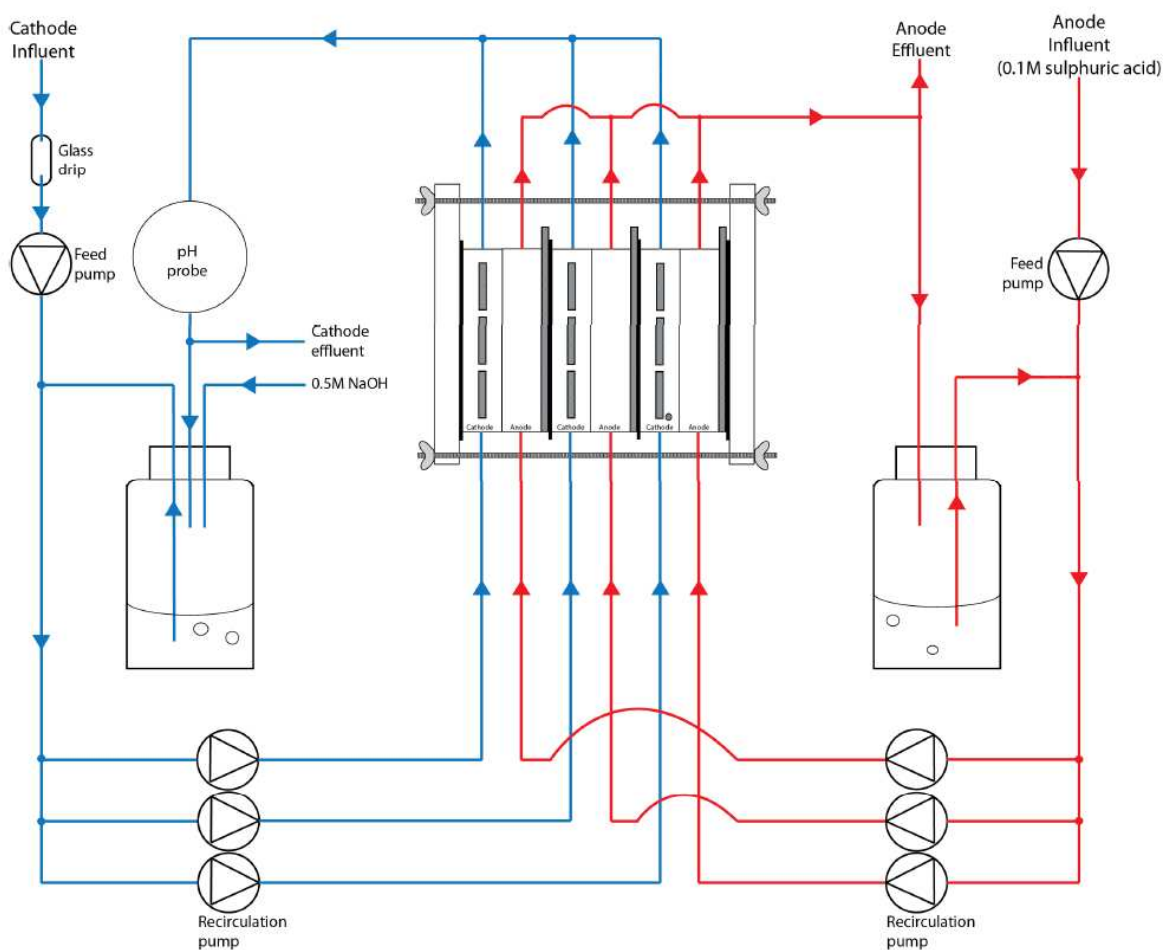

**Fig. S1** Schematic diagram of the recirculation and feed circuits. Cathode flow is indicated in blue, anode flow in red. Cathode influent was pumped into the cathodic electrolyte recirculation stream at  $3 \text{ L day}^{-1}$  through a glass drip to avoid contamination of the stock solution. The influent was split into three pump channels before entering each cathode at a flow rate of  $80 \text{ mL min}^{-1}$ . The cathode was maintained at pH 5.5 by automated NaOH dosing. The anode influent ( $0.1 \text{ M}$  sulphuric acid) was pumped into the anode electrolyte recirculation stream at  $3 \text{ L day}^{-1}$ . The anode electrolyte was also split into three pump channels before entering each anode at a flow rate of  $80 \text{ mL min}^{-1}$ . Excess electrolytes were drained from both cathodes and anodes from overflow tubes.

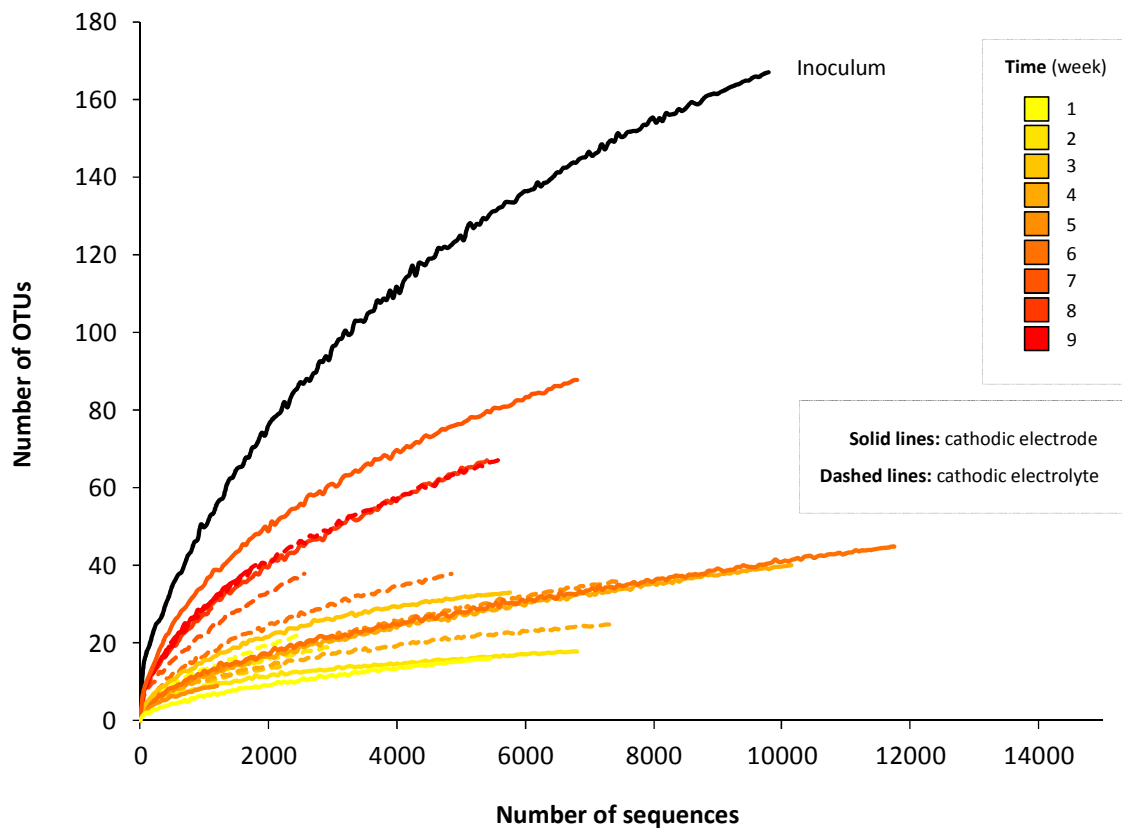

**Fig. S2** Individual-based rarefaction curves for each sample.

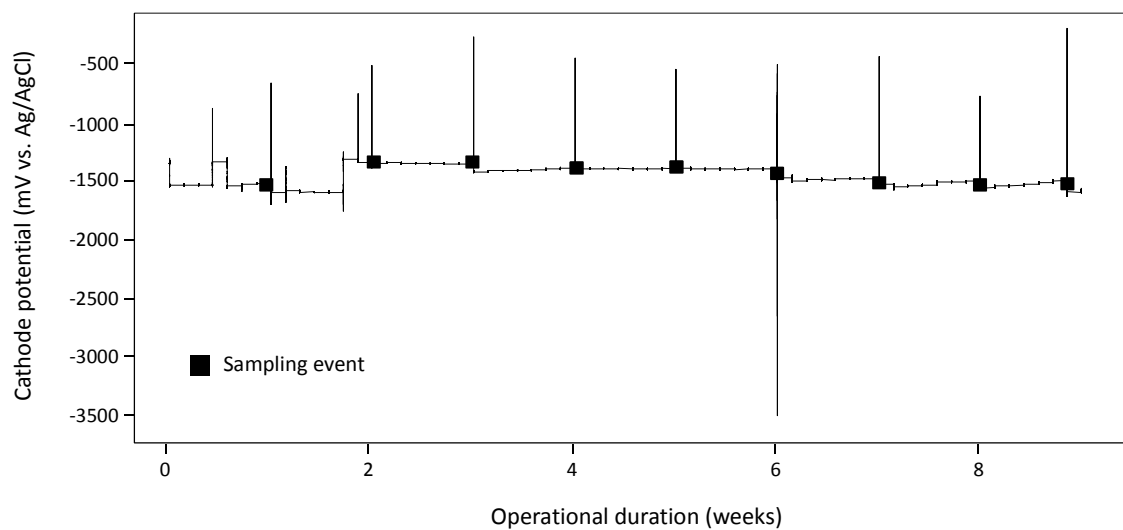

**Fig. S3** Cathode potential over time during galvanostatic operation at  $-0.32 \text{ mA cm}^{-2}$ . The spikes occur when the potentiostat/galvanostat is paused for sampling.
